# Supplementary material for: Immune Mediators in Osteoarthritis: Infrapatellar Fat Pad-Infiltrating CD8+ T Cells Are Increased in Osteoarthritic Patients with Higher Clinical Radiographic Grading
Source: Hindawi journal article supplement (doi:10.1155/2016/9525724), 2016-01-01
Supplement: f1 [file 9525724.f1.pdf]

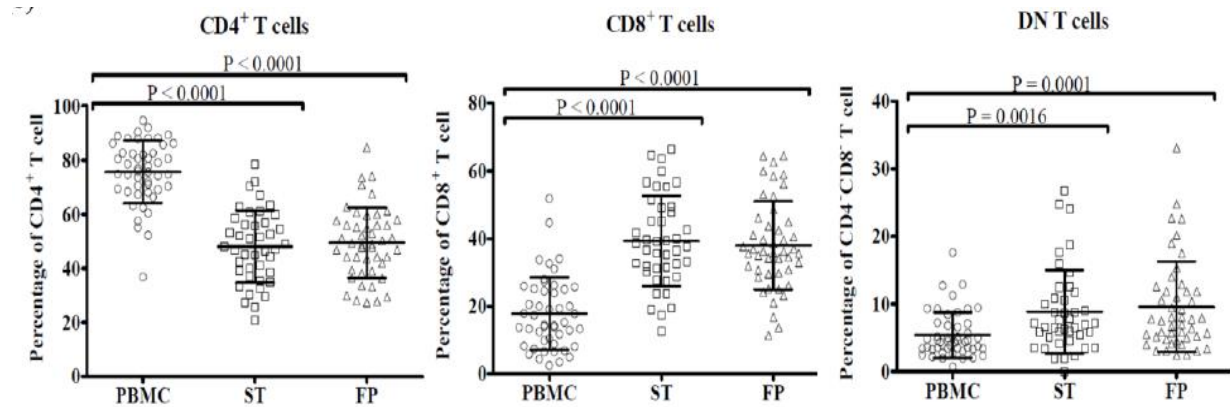

**Supplementary figure 1: T cell subsets in peripheral blood, synovial tissue and infrapatellar fat pad in knee osteoarthritis patients.**

Isolated mononuclear cells were evaluated for their CD4<sup>+</sup> and CD8<sup>+</sup> co-receptor cell surface expression. Graphs comparing different T cell frequency of CD4<sup>+</sup> T cells, CD8<sup>+</sup> T cells and DN T cells in peripheral blood (PBMC) (n=48), synovial tissue (N=42) and infrapatellar fat pad (N=47). Each dot represents one patient. Mean values are shown with error bars.
